# Supplementary material for: A polypyrrole-coated GCE sensor for sensitive detection of 5-fluorouracil via molecular imprinting
Source: Royal Society of Chemistry journal article supplement (doi:10.1039/d5ay00345h), 2025-01-01
Supplement: d5ay00345h1.pdf [file d5ay00345h1.pdf]

## Polypyrrole-coated GCE Sensor for sensitive detection of 5-Fluorouracil *via* molecular imprinting

Manjeet Harijan, Akriti Srivastava and Meenakshi Singh\*

Department of Chemistry, MMV

Banaras Hindu University, Varanasi-221005, INDIA

E-mail: [meenakshi@bhu.ac.in](mailto:meenakshi@bhu.ac.in)

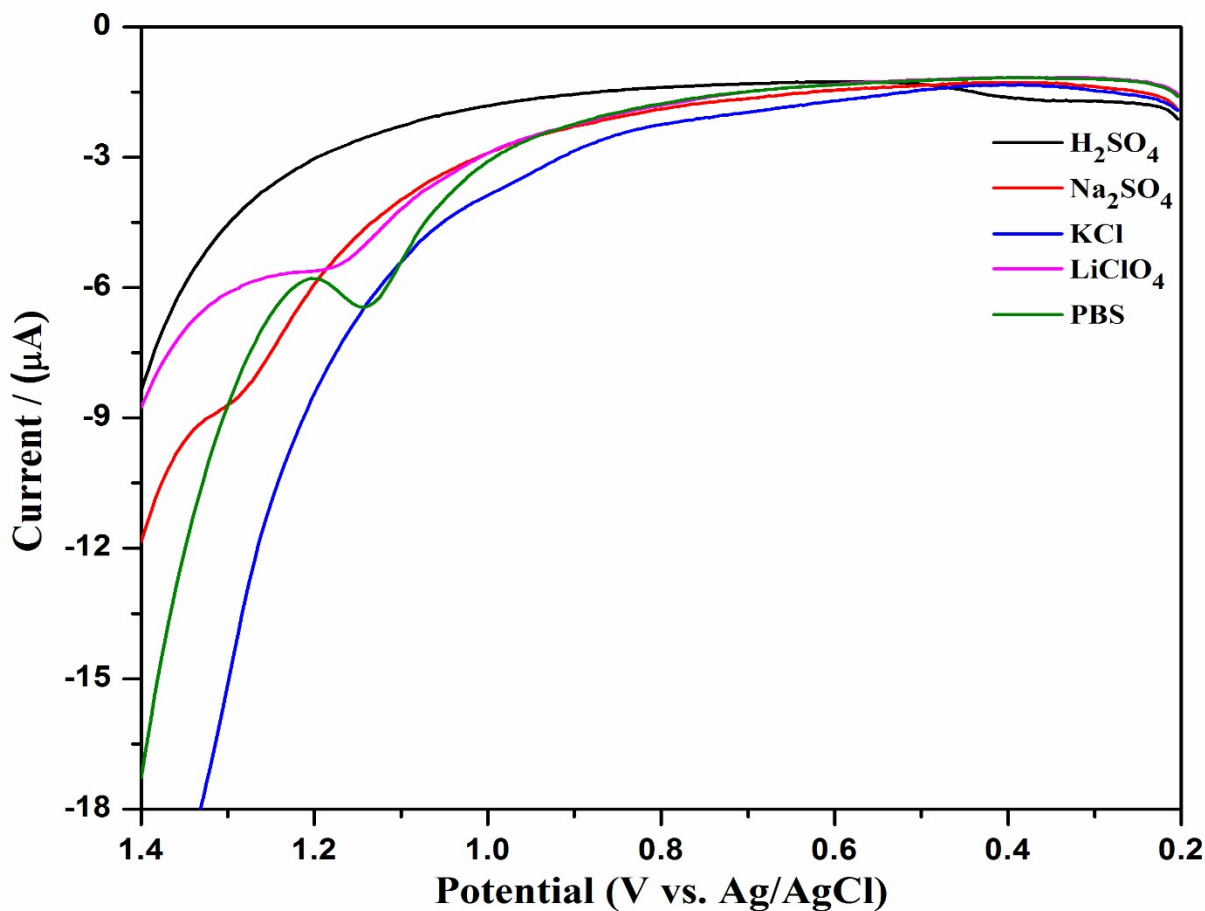

**Figure S1:** DPV response of 10  $\mu\text{M}$  5-FU in 0.1 M of  $\text{H}_2\text{SO}_4$ ,  $\text{Na}_2\text{SO}_4$ , KCl,  $\text{LiClO}_4$  and PBS as supporting electrolytes on MIP sensor.

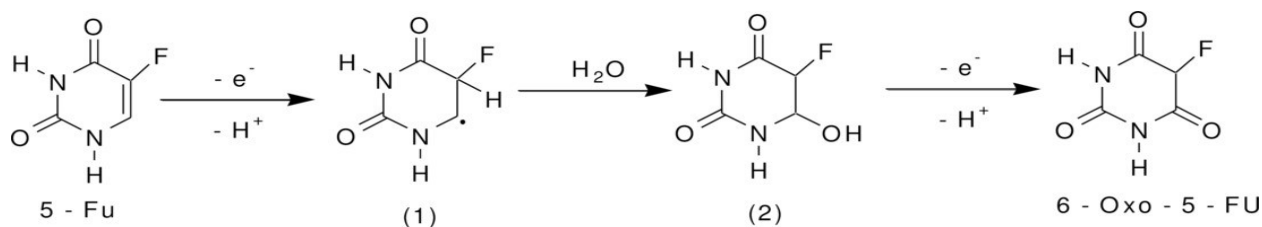

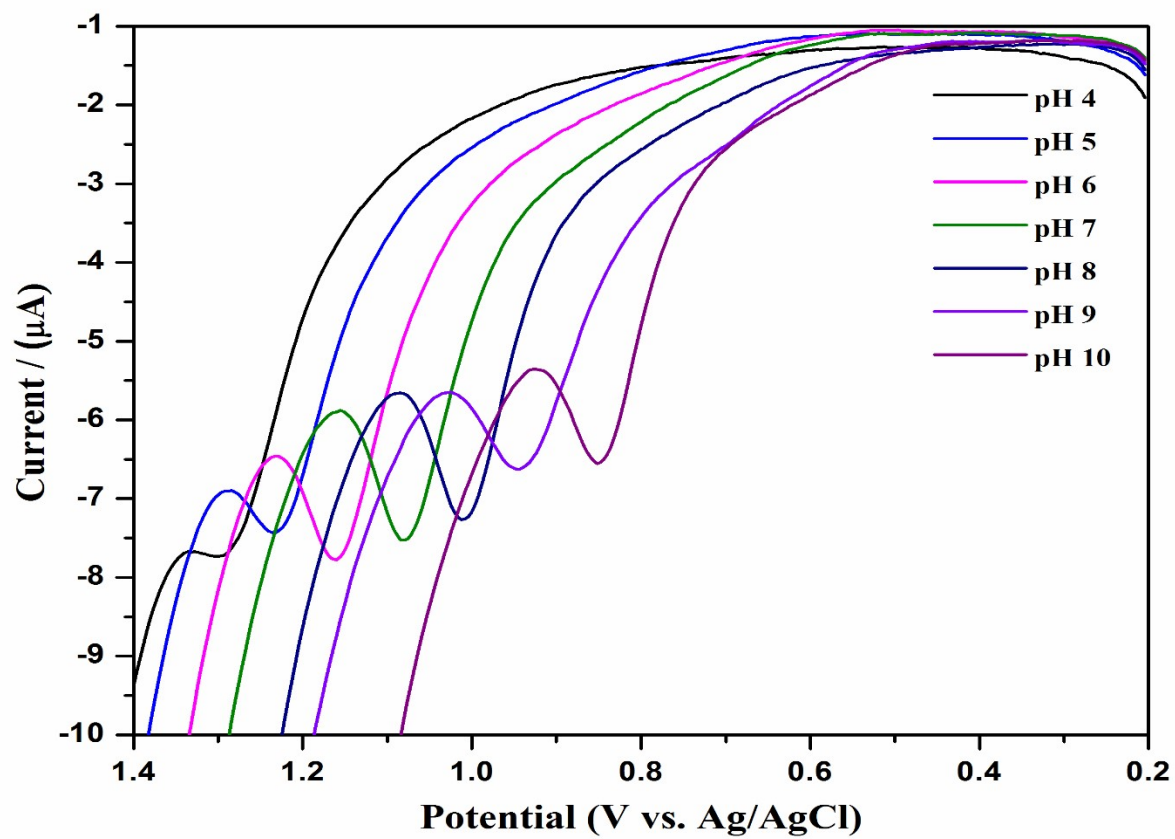

**Figure S2:** DPV response of 10  $\mu\text{M}$  5-FU obtained on fabricated MIP sensor in 0.1 M PBS at varying pH (*i.e.*, pH 4, 5, 6, 7, 8, 9 and 10).

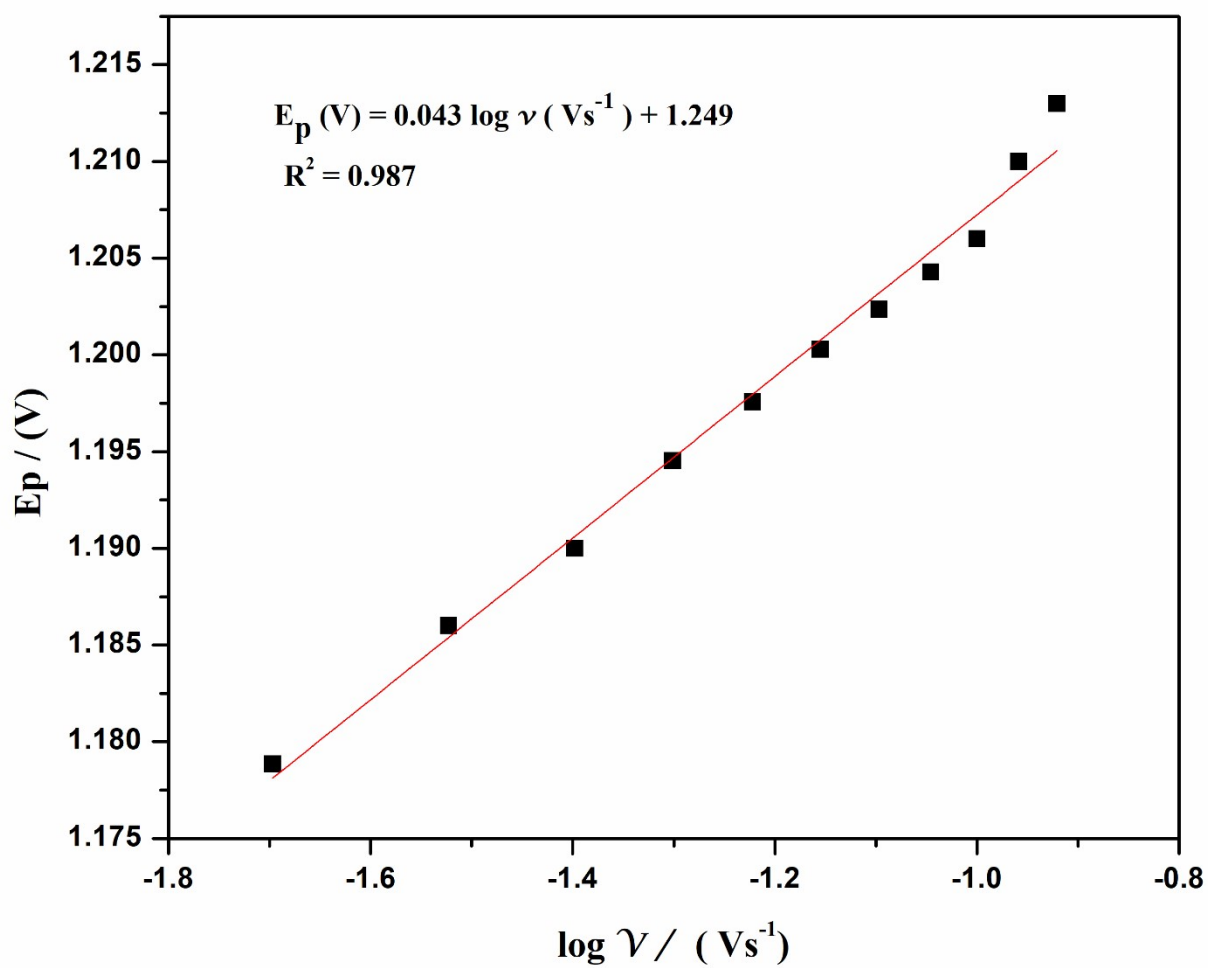

**Figure S3:** Relationship between peak potential and logarithm of scan rate.

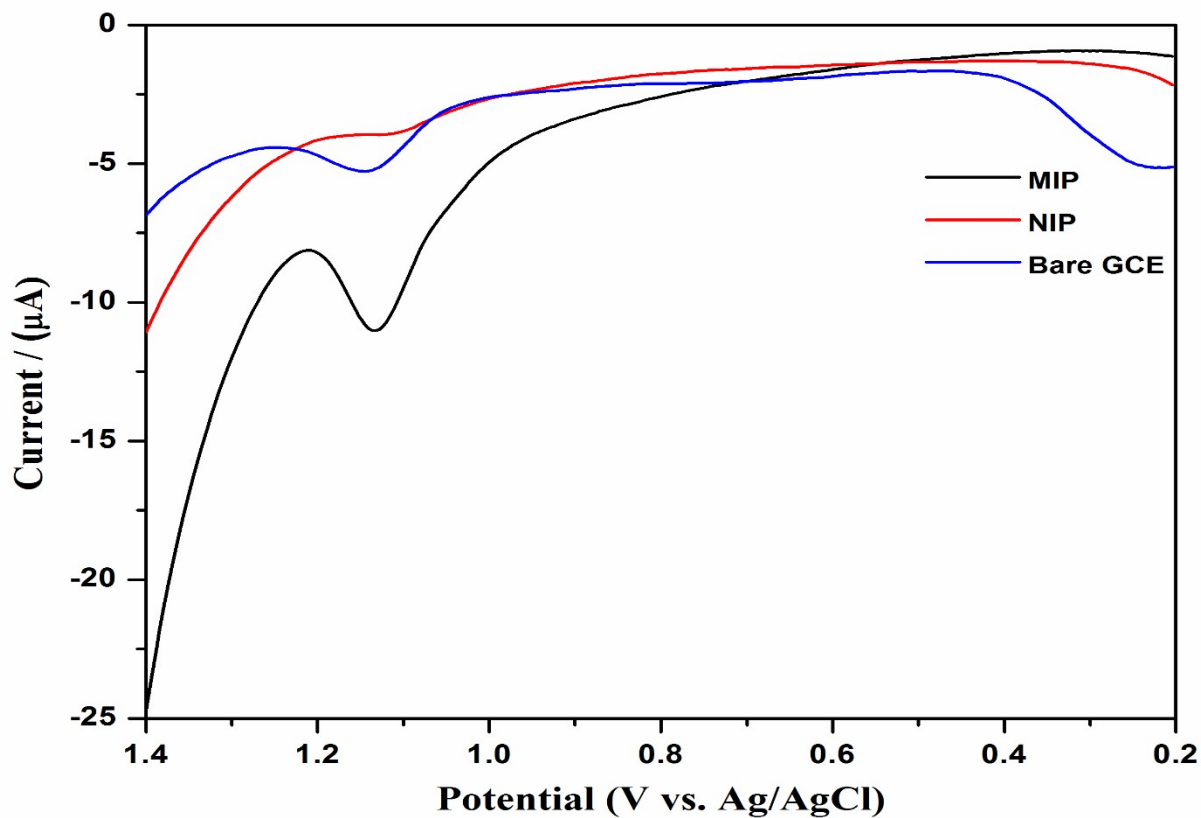

**Figure S4:** DPV response of 26  $\mu\text{M}$  5-FU on different modified electrodes in phosphate buffer (pH 6.0): MIP (black), bare GCE (blue) and NIP (red).

**Table S1:** Freundlich isotherms parameters for the adsorption of 5-FU onto MIP/ NIP-coated GCE electrode.

| Modified Surface | a     | m     | R <sup>2</sup> |
|------------------|-------|-------|----------------|
| MIP              | 2.432 | 0.443 | 0.996          |
| NIP              | 0.648 | 0.470 | 0.918          |
